# Supplementary material for: Cells Expressing the C/EBPbeta Isoform, LIP, Engulf Their Neighbors
Source: PLOS journal article supplement (doi:10.1371/journal.pone.0041807), 2012-07-31
Supplement: S5 (10.1371/journal.pone.0041807.s005) [file journal.pone.0041807.s005]

**Supplementary Table 1A. Expression of “eat me” signals in MDA-MB-231 breast cancer cells.** MDA-MB-231 breast cancer cells infected with AdLIP, Ad-GFP or uninfected cells were harvested 72 hrs postinfection and total RNA was subject to genomic profiling using Affymetrix human U133Plus 2.0 microarrays. Expression values for the indicated probe sets are shown and are representative of three independent determinations performed by the Vanderbilt Microarray Shared Resource.

| Gene          | Probe ID    | 231-No virus | 231-GFP | 231-LIP |
|---------------|-------------|--------------|---------|---------|
| CD31 (PECAM1) | 208982_at   | 108          | 92      | 87.4    |
|               | 1559921_at  | 139          | 94      | 118     |
|               | 208981_at   | 86           | 87      | 58      |
|               | 208983_s_at | 2            | 37      | 9       |
| SIRPalpha     | 217240_at   | 80           | 15      | 49      |
|               | 202895_s_at | 13           | 80      | 2       |
|               | 202896_s_at | 65           | 53      | 45      |
|               | 202897_s_at | 10           | 3       | 9       |
| CD47          | 213055_at   | 141          | 193     | 100     |
|               | 213856_at   | 1            | 4       | 4       |
|               | 213857_s_at | 10684        | 10869   | 11985   |

**Supplementary Table 1B. Expression of “eat me” signals in MDA-MB-468 breast cancer cells.** MDA-MB-468 breast cancer cells infected with AdLIP, Ad-GFP or uninfected cells were harvested 72 hrs postinfection and total RNA was subject to genomic profiling performed by the Vanderbilt Microarray Shared Resource using Affymetrix human U133Plus 2.0 microarrays. Expression values for the indicated probe sets are shown.

| Gene          | Probe ID    | 468-No virus | 468-GFP | 468-LIP |
|---------------|-------------|--------------|---------|---------|
| CD31 (PECAM1) | 208982_at   | 64           | 69      | 47      |
|               | 1559921_at  | 43           | 46      | 44      |
|               | 208981_at   | 25           | 39      | 23      |
|               | 208183_s_at | 7            | 8       | 7       |
| SIRPalpha     | 217240_at   | 28           | 32      | 30      |
|               | 202895_s_at | 11           | 15      | 12      |
|               | 202896_s_at | 86           | 86      | 99      |
|               | 202897_s_at | 36           | 44      | 41      |
| CD47          | 213055_at   | 60           | 56      | 59      |
|               | 213856_at   | 9            | 11      | 15      |
|               | 213857_s_at | 2111         | 2050    | 2560    |
